# Supplementary material
Source: PubMed Central journal article supplement (PMC6583427)
Supplement: jamapediatr-173-44-s001.pdf [file jamapediatr-173-44-s001.pdf]

## Supplementary Online Content

Tubbs-Cooley HL, Mara CA, Carle AC, Mark BA, Pickler RH. Association of nurse workload with missed nursing care in the neonatal intensive care unit. *JAMA Pediatr*. Published online November 12, 2018. doi:10.1001/jamapediatrics.2018.3619

**eTable.** Pairwise Tetrachoric Missed Care Item Correlations,  $\rho$  (SE)

This supplementary material has been provided by the authors to give readers additional information about their work.

**eTable. Pairwise Tetrachoric Missed Care Item Correlations,  $\rho$  (SE)**

|                                                                  | <b>Missed Hourly IV Check</b> | <b>Missed Central Venous Catheter Bundle</b> | <b>Missed Oral Feeding</b> | <b>Missed Assessment</b> | <b>Missed Labs</b> | <b>Missed Parent Involvement</b> | <b>Missed Ventilator Associated Respiratory Infection Bundle</b> | <b>Missed Handoff</b> | <b>Missed 6 rights during med admin</b> | <b>Missed dbl. Check high-risk med</b> | <b>Missed Safety Checks</b> |
|------------------------------------------------------------------|-------------------------------|----------------------------------------------|----------------------------|--------------------------|--------------------|----------------------------------|------------------------------------------------------------------|-----------------------|-----------------------------------------|----------------------------------------|-----------------------------|
| <b>Missed Hourly IV Check</b>                                    | 1.00                          |                                              |                            |                          |                    |                                  |                                                                  |                       |                                         |                                        |                             |
| <b>Missed Central Venous Catheter Bundle</b>                     | 0.89<br>(0.01)                | 1.0                                          |                            |                          |                    |                                  |                                                                  |                       |                                         |                                        |                             |
| <b>Missed Oral Feeding</b>                                       | 0.32<br>(0.07)                | 0.31<br>(0.08)                               | 1.0                        |                          |                    |                                  |                                                                  |                       |                                         |                                        |                             |
| <b>Missed Assessment</b>                                         | 0.65<br>(0.02)                | 0.58<br>(0.03)                               | 0.60<br>(0.03)             | 1.0                      |                    |                                  |                                                                  |                       |                                         |                                        |                             |
| <b>Missed Labs</b>                                               | 0.40<br>(0.05)                | 0.39<br>(0.06)                               | 0.36<br>(0.09)             | 0.35<br>(0.05)           | 1.0                |                                  |                                                                  |                       |                                         |                                        |                             |
| <b>Missed Parent Involvement</b>                                 | 0.33<br>(0.04)                | 0.23<br>(0.05)                               | 0.51<br>(0.05)             | 0.49<br>(0.03)           | 0.28<br>(0.07)     | 1.0                              |                                                                  |                       |                                         |                                        |                             |
| <b>Missed Ventilator Associated Respiratory Infection Bundle</b> | 0.58<br>(0.04)                | 0.55<br>(0.05)                               | 0.39<br>(0.17)             | 0.54<br>(0.04)           | 0.47<br>(0.08)     | 0.28<br>(0.07)                   | 1.0                                                              |                       |                                         |                                        |                             |
| <b>Missed Handoff</b>                                            | 0.32<br>(0.04)                | 0.32<br>(0.05)                               | 0.44<br>(0.05)             | 0.52<br>(0.03)           | 0.59<br>(0.05)     | 0.52<br>(0.04)                   | 0.54 (0.06)                                                      | 1.0                   |                                         |                                        |                             |
| <b>Missed 6 rights during med admin</b>                          | 0.46<br>(0.04)                | 0.45<br>(0.04)                               | 0.43<br>(0.06)             | 0.47<br>(0.03)           | 0.42<br>(0.06)     | 0.36<br>(0.05)                   | 0.53 (0.05)                                                      | 0.42<br>(0.04)        | 1.0                                     |                                        |                             |

|                                        | <b>Missed Hourly IV Check</b> | <b>Missed Central Venous Catheter Bundle</b> | <b>Missed Oral Feeding</b> | <b>Missed Assessment</b> | <b>Missed Labs</b> | <b>Missed Parent Involvement</b> | <b>Missed Ventilator Associated Respiratory Infection Bundle</b> | <b>Missed Handoff</b> | <b>Missed 6 rights during med admin</b> | <b>Missed dbl. Check high-risk med</b> | <b>Missed Safety Checks</b> |
|----------------------------------------|-------------------------------|----------------------------------------------|----------------------------|--------------------------|--------------------|----------------------------------|------------------------------------------------------------------|-----------------------|-----------------------------------------|----------------------------------------|-----------------------------|
| <b>Missed dbl. check high-risk med</b> | 0.47<br>(0.05)                | 0.42<br>(0.06)                               | 0.49<br>(0.13)             | 0.52<br>(0.05)           | 0.42<br>(0.09)     | 0.34<br>(0.08)                   | 0.53 (0.07)                                                      | 0.41<br>(0.07)        | 0.63<br>(0.05)                          | 1.0                                    |                             |
| <b>Missed Safety Checks</b>            | 0.54<br>(0.04)                | 0.56<br>(0.04)                               | 0.49<br>(0.06)             | 0.59<br>(0.03)           | 0.42<br>(0.08)     | 0.44<br>(0.05)                   | 0.54 (0.06)                                                      | 0.53<br>(0.04)        | 0.54<br>(0.04)                          | 0.54<br>(0.07)                         | 1.0                         |

p<.001 for all correlations
